# Supplementary material for: A Missense Mutation in the SERPINH1 Gene in Dachshunds with Osteogenesis Imperfecta
Source: PubMed Central journal article supplement (PMC2708911; doi:10.1371/journal.pgen.1000579), 2009-07-24

**Figure S1.** Pedigrees of sampled Dachshunds. Animals genotyped on the SNP chip are indicated by asterisks. The genotypes for the *SERPINH1* c.977T>C mutation are given below the symbols.

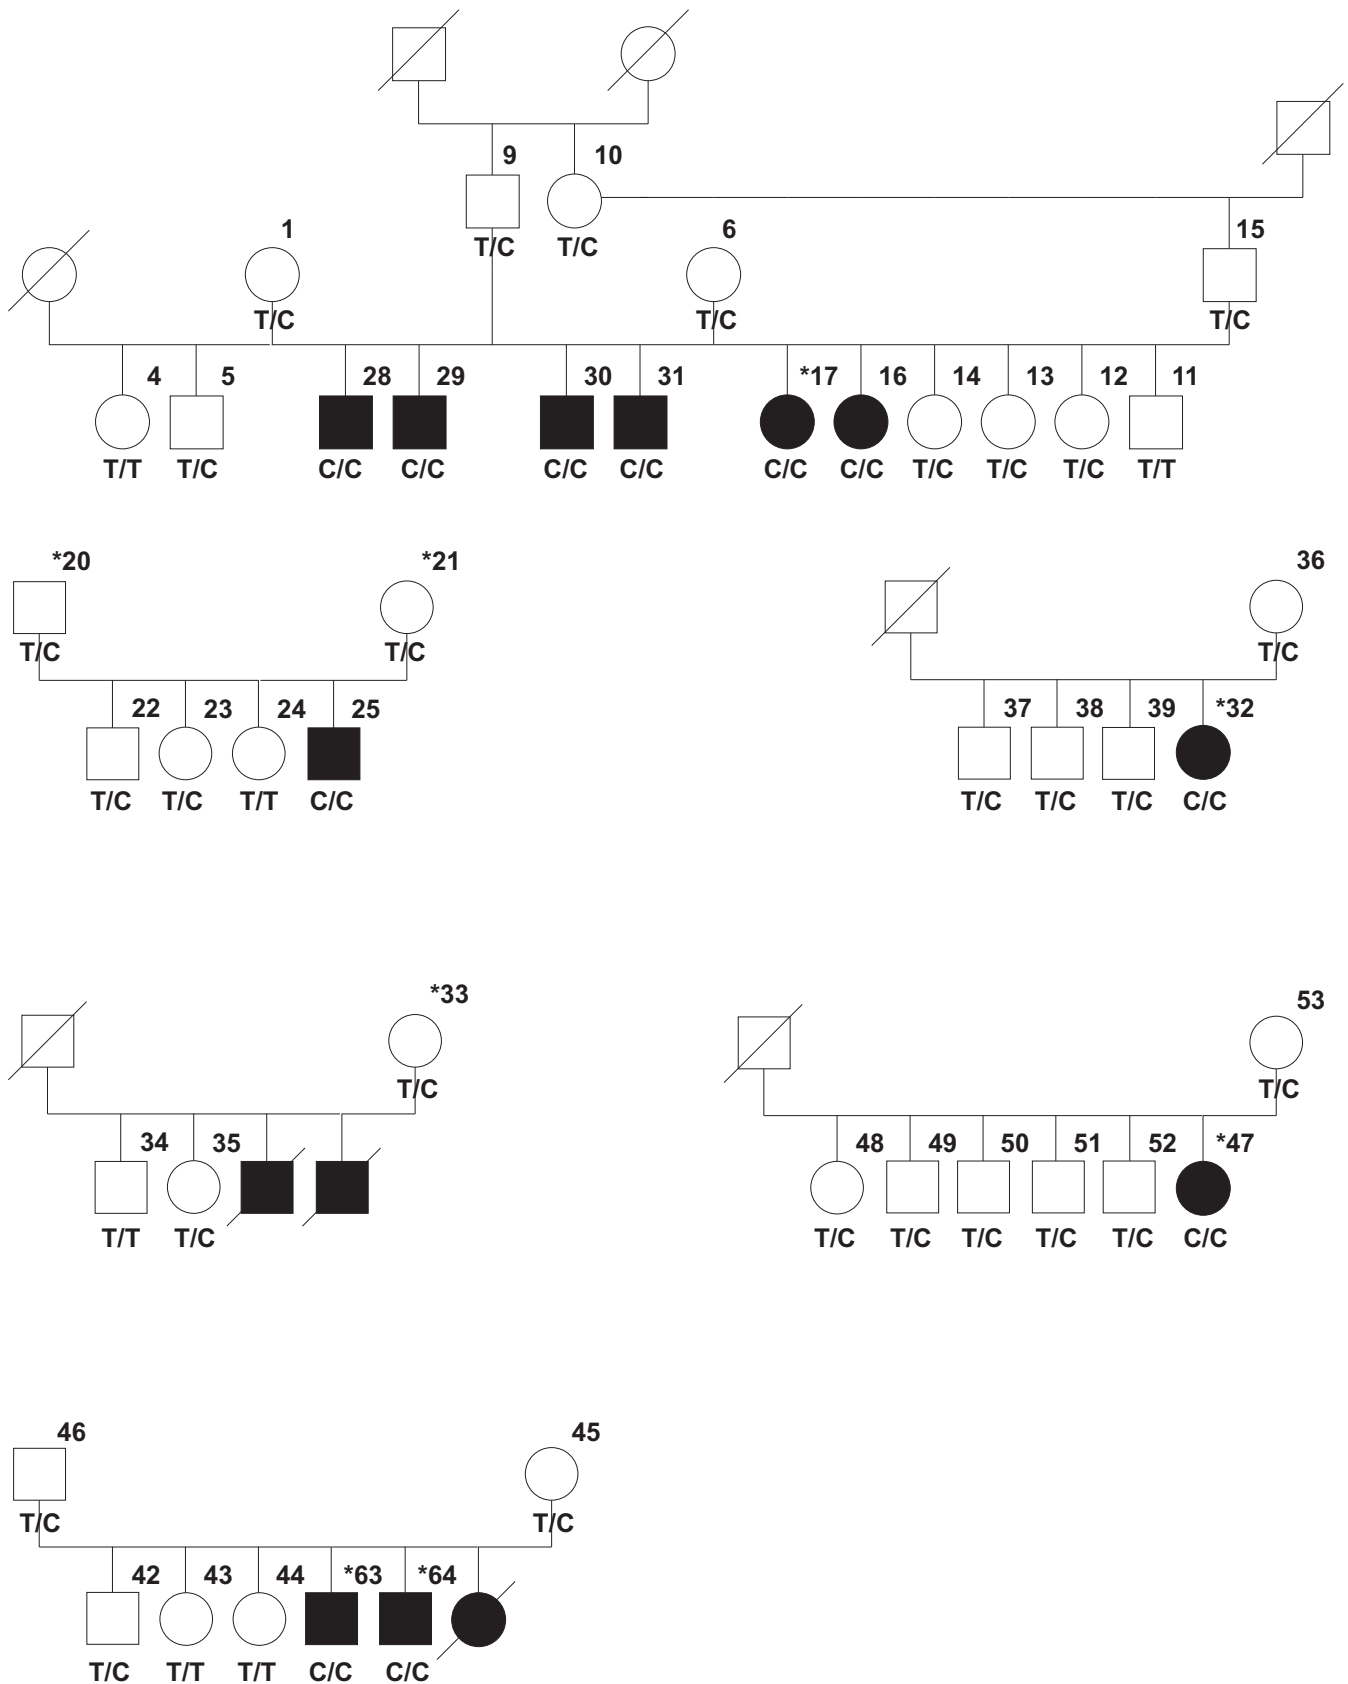

Supplement: pgen.1000579.s001.pdf [file pgen.1000579.s001.pdf]
