# Supplementary material for: A Missense Mutation in the SERPINH1 Gene in Dachshunds with Osteogenesis Imperfecta
Source: PLoS Genet. 2009 Jul 24;5(7):e1000579. doi: 10.1371/journal.pgen.1000579 (PMC2708911; doi:10.1371/journal.pgen.1000579)
Supplement: Table S1 — Microsatellites. (0.02 MB XLS) [file pgen.1000579.s002.xls]

## Sheet: micros
Table S1. Microsatellites
	Position				Allele size	Number		Twopoint linkage
Microsatellite	(Mb, build 2.1)	Repeat type	Forward primer sequence (5´-3´)	Reverse primer sequence (5´-3´)	(bp)	of alleles	PIC	LOD	alpha	HLOD
	CFA 9
COL1A1_MS1	29.176	24xAT	TTCTAGCAAGTGTGCATGTGTG	AAGATGCGAAACCAACCATTAT	138-154	4	0.352	1.418	1	1.418
COL1A1_MS2	29.481	20xGT	GTCCCTTGGTATCCACCTACAG	AGGCTTTCTTGTAAGGCAACTG	147-151	3	0.473	1.435	0.791	1.584
COL1A1_MS4	30.869	25xTA	TTTAACCTCGCCATCATTTTCT	TCCCTTTTGCTTTTACTCTGGA	194-220	5	0.615	1.262	0.762	1.435
COL1A1 gene	29.508 - 29.524
	CFA 14
COL1A2_MS1	22.488	23xTA	CCAGGAACACTTCTGGCACTAT	TGTGATCTCTTCTGCTTTTGCT	274-294	4	0.566	-INFINITY	0	0
COL1A2_MS2	22.803	21xCT	GTGTGGAGTTTGGGCTCAGTAT	CTAGATGGCACTGCAGTCAGGT	322-332	6	0.639	-INFINITY	0	0
COL1A2_MS4	23.527	20xGT	AGCAGTGCAACGTAAAAATCCT	AACATGAATAAATTTTGCCCTGA	160-170	5	0.481	-INFINITY	0	0
COL1A2 gene	22.831- 22.867
	CFA 21
SERPINH1_MS1	23.028	20xCA	ACCTCAGTGTGGCCTTTCTC	TCTGCTCCCAGAAGCCTTTA	179-191	6	0.579	4.064	1	4.064
SERPINH1_MS2	23.004	16xCA	TGCAGGTCACCAATAAGCAA	CGAAGACTCTCCTGCACACA	108-112	4	0.414	0.506	1	0.506
SERPINH1 gene	26.038 - 26.047
